# Supplementary material for: Hybrid cell membranes camouflage liposomes containing payloads to improve breast cancer chemo and photodynamic therapy
Source: Royal Society of Chemistry journal article supplement (doi:10.1039/d4bm00772g), 2024-01-01
Supplement: d4bm00772g1.pdf [file d4bm00772g1.pdf]

## Supplementary Information

### Hybrid cell membranes camouflaging liposomes with payloads improves chemotherapy and photodynamic therapy of breast cancer

Chengfang Wang<sup>1</sup> and Size Wu<sup>1\*</sup>

Department of Ultrasound, The First Affiliated Hospital of Hainan Medical University,  
No.31, Longhua Road, Haikou570102, China

#### 1. Supplementary Information 1 Photo of the sample

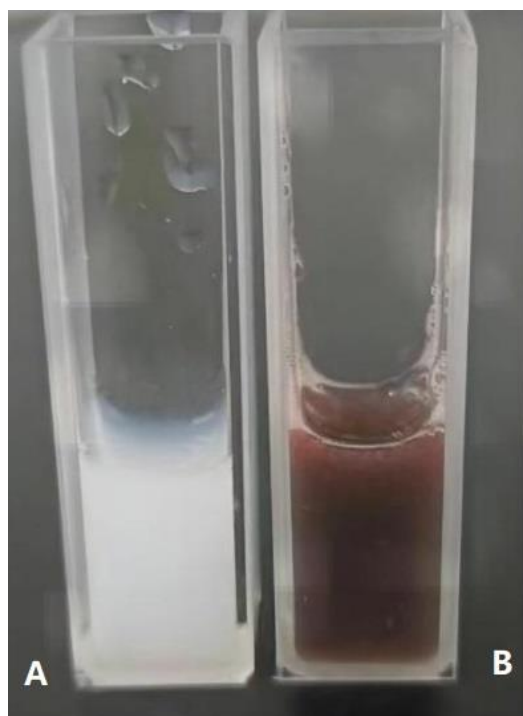

#### Supplementary Figure Legend

**Supplementary Figure 1** A. Suspension of liposomes. B. Suspension of Dox-IR 780@Lip@Ms

**2. Supplementary Information 2** Sizes of liposomes loaded with Dox and IR780 without and with hybrid cell membranes camouflaging

| Dox-IR780@Lip |               |   | Dox-IR780@Lip@Ms |               |   |
|---------------|---------------|---|------------------|---------------|---|
| Diameter      | percentage(%) |   | Diameter         | percentage(%) |   |
| 0.34          |               | 0 | 0.34             |               | 0 |
| 0.38          |               | 0 | 0.38             |               | 0 |
| 0.43          |               | 0 | 0.43             |               | 0 |
| 0.49          |               | 0 | 0.49             |               | 0 |
| 0.55          |               | 0 | 0.55             |               | 0 |
| 0.62          |               | 0 | 0.62             |               | 0 |
| 0.7           |               | 0 | 0.7              |               | 0 |
| 0.8           |               | 0 | 0.8              |               | 0 |
| 0.9           |               | 0 | 0.9              |               | 0 |
| 1.02          |               | 0 | 1.02             |               | 0 |
| 1.15          |               | 0 | 1.15             |               | 0 |
| 1.3           |               | 0 | 1.3              |               | 0 |
| 1.47          |               | 0 | 1.47             |               | 0 |
| 1.66          |               | 0 | 1.66             |               | 0 |
| 1.87          |               | 0 | 1.87             |               | 0 |
| 2.11          |               | 0 | 2.11             |               | 0 |
| 2.39          |               | 0 | 2.39             |               | 0 |
| 2.7           |               | 0 | 2.7              |               | 0 |
| 3.05          |               | 0 | 3.05             |               | 0 |
| 3.45          |               | 0 | 3.45             |               | 0 |
| 3.89          |               | 0 | 3.89             |               | 0 |
| 4.4           |               | 0 | 4.4              |               | 0 |
| 4.97          |               | 0 | 4.97             |               | 0 |
| 5.61          |               | 0 | 5.61             |               | 0 |
| 6.34          |               | 0 | 6.34             |               | 0 |
| 7.17          |               | 0 | 7.17             |               | 0 |
| 8.1           |               | 0 | 8.1              |               | 0 |
| 9.15          |               | 0 | 9.15             |               | 0 |
| 10.34         |               | 0 | 10.34            |               | 0 |
| 11.68         |               | 0 | 11.68            |               | 0 |
| 13.2          |               | 0 | 13.2             |               | 0 |
| 14.91         |               | 0 | 14.91            |               | 0 |
| 16.84         |               | 0 | 16.84            |               | 0 |
| 19.03         |               | 0 | 19.03            |               | 0 |
| 21.5          |               | 0 | 21.5             |               | 0 |
| 24.29         |               | 0 | 24.29            |               | 0 |
| 27.45         |               | 0 | 27.45            |               | 0 |

|         |        |         |        |
|---------|--------|---------|--------|
| 31.01   | 0      | 31.01   | 0      |
| 35.03   | 0      | 35.03   | 0      |
| 39.58   | 0      | 39.58   | 0      |
| 44.72   | 0      | 44.72   | 0      |
| 50.53   | 0      | 50.53   | 0      |
| 57.09   | 0      | 57.09   | 0      |
| 64.5    | 0      | 64.5    | 0      |
| 72.87   | 0.042  | 72.87   | 0      |
| 82.33   | 2.484  | 82.33   | 0.674  |
| 93.02   | 8.692  | 93.02   | 5.245  |
| 105.1   | 14.338 | 105.1   | 11.625 |
| 118.74  | 17.553 | 118.74  | 16.396 |
| 134.16  | 18.019 | 134.16  | 18.363 |
| 151.57  | 16.074 | 151.57  | 17.535 |
| 171.25  | 12.325 | 171.25  | 14.432 |
| 193.48  | 7.566  | 193.48  | 9.836  |
| 218.6   | 2.906  | 218.6   | 4.838  |
| 246.98  | 0      | 246.98  | 1.056  |
| 279.04  | 0      | 279.04  | 0      |
| 315.27  | 0      | 315.27  | 0      |
| 356.2   | 0      | 356.2   | 0      |
| 402.44  | 0      | 402.44  | 0      |
| 454.69  | 0      | 454.69  | 0      |
| 513.71  | 0      | 513.71  | 0      |
| 580.41  | 0      | 580.41  | 0      |
| 655.76  | 0      | 655.76  | 0      |
| 740.89  | 0      | 740.89  | 0      |
| 837.07  | 0      | 837.07  | 0      |
| 945.74  | 0      | 945.74  | 0      |
| 1068.52 | 0      | 1068.52 | 0      |
| 1207.24 | 0      | 1207.24 | 0      |
| 1363.97 | 0      | 1363.97 | 0      |
| 1541.04 | 0      | 1541.04 | 0      |
| 1741.1  | 0      | 1741.1  | 0      |
| 1967.14 | 0      | 1967.14 | 0      |
| 2222.51 | 0      | 2222.51 | 0      |
| 2511.05 | 0      | 2511.05 | 0      |
| 2837.04 | 0      | 2837.04 | 0      |
| 3205.35 | 0      | 3205.35 | 0      |
| 3621.48 | 0      | 3621.48 | 0      |
| 4091.63 | 0      | 4091.63 | 0      |
| 4622.81 | 0      | 4622.81 | 0      |
| 5222.96 | 0      | 5222.96 | 0      |
| 5901.02 | 0      | 5901.02 | 0      |

|         |   |         |   |
|---------|---|---------|---|
| 6667.1  | 0 | 6667.1  | 0 |
| 7532.65 | 0 | 7532.65 | 0 |
| 8510.56 | 0 | 8510.56 | 0 |
| 9615.42 | 0 | 9615.42 | 0 |

### 3. Supplementary Information 3 Electrophoresis 1

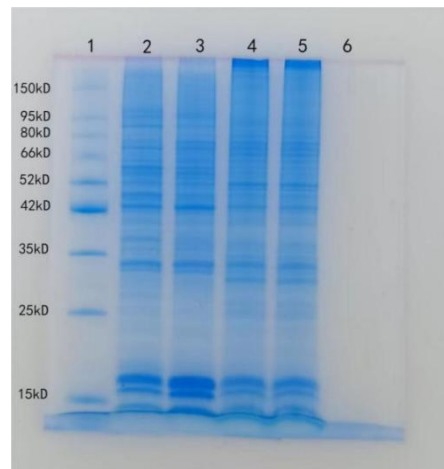

#### Supplementary Figure Legend

**Supplementary Figure 2** SDS-PAGE Protein analysis [1. Protein Marker (10-150kD, non-pre-dyed); 2. RAW264.7 cell membrane; 3. 4T1 cell membrane; 4. 4T1-RAW hybrid membrane; 5. Dox-IR780@Lip@Ms; 6. Dox-IR780@Lip]

### 3. Supplementary Information 3 Electrophoresis 2

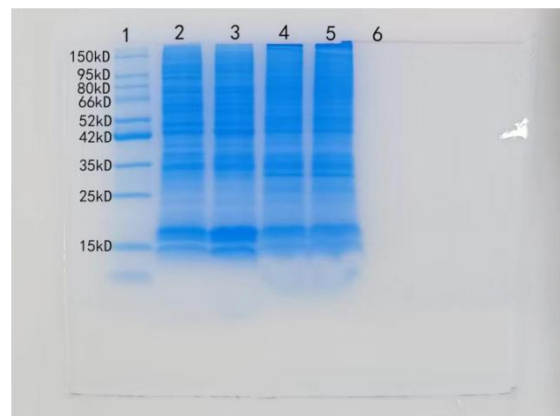

#### Supplementary Figure Legend

#### Supplementary Figure 3

SDS-PAGE Protein analysis [1. Protein Marker (10-150kD, non-pre-dyed); 2. RAW264.7 cell membrane; 3. 4T1 cell membrane; 4. 4T1-RAW hybrid membrane; 5. Dox-IR780@Lip@Ms; 6. Dox-IR780@Lip]

### 3. Supplementary Information 3 Electrophoresis 3

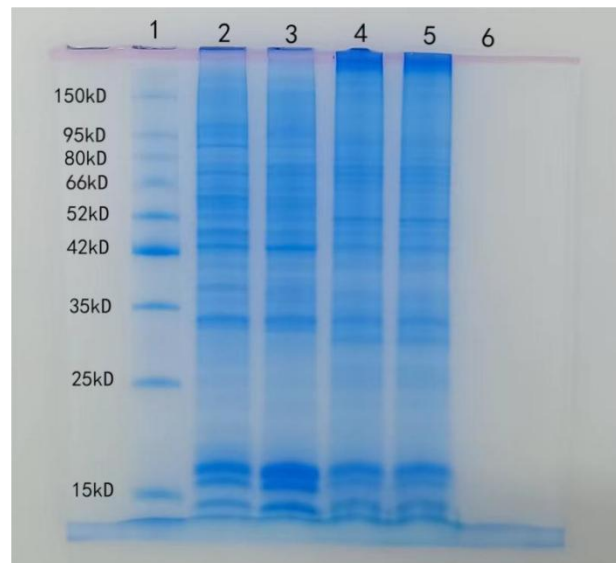

#### Supplementary Figure Legend

**Supplementary Figure 4** SDS-PAGE Protein analysis [1. Protein Marker (10-150kD, non-pre-dyed); 2. RAW264.7 cell membrane; 3. 4T1 cell membrane; 4. 4T1-RAW hybrid membrane; 5. Dox-IR780@Lip@Ms; 6. Dox-IR780@Lip]

### 4. Supplementary Information 4 UV-vis spectra 1

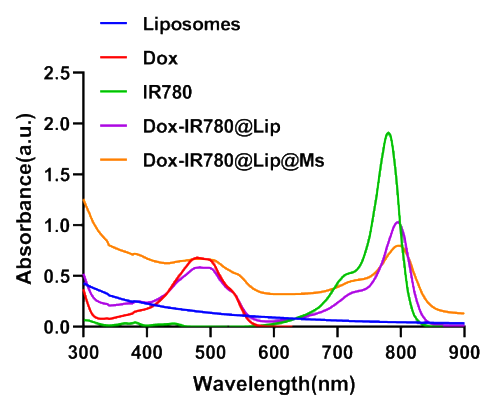

#### Supplementary Figure Legend

**Supplementary Figure 5** UV-vis spectra of blank liposomes, Dox, IR780, Dox-IR780@Lip, and Dox-IR780@Lip@Ms.

#### 4.Supplementary Information 4 UV-vis spectra 2

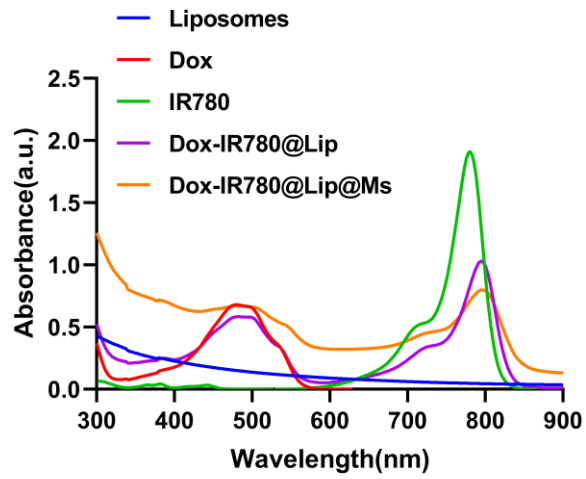

#### Supplementary Figure Legend

**Supplementary Figure 6** UV-vis spectra of blank liposomes, Dox, IR780, Dox-IR780@Lip, and Dox-IR780@Lip@Ms.

## 5. Supplementary Information 5 Wound healing assay

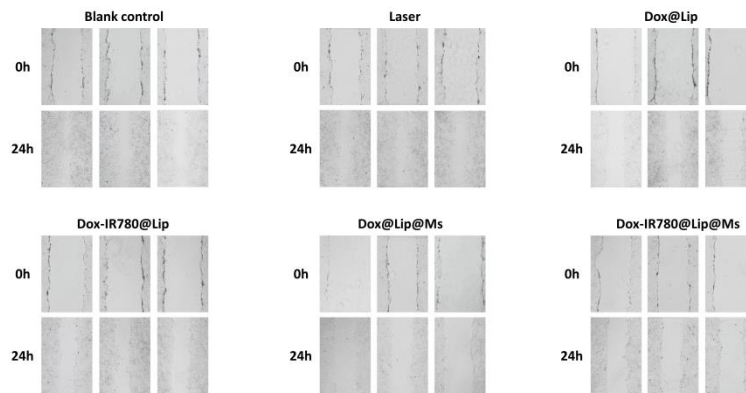

Figure 7a Wound Healing Assay

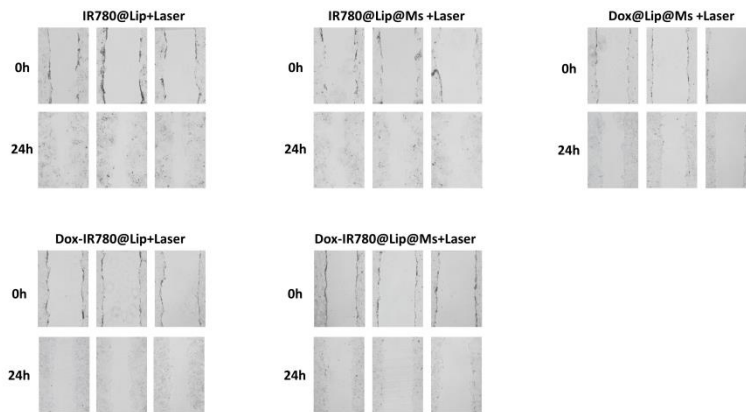

Figure 7b Wound Healing Assay 2

### Supplementary Figure Legend

**Supplementary Figure 7** The wound healing effects (closure) of 4T1 cells after different treatments.



## 6. Supplementary Information 6 Transwell assay

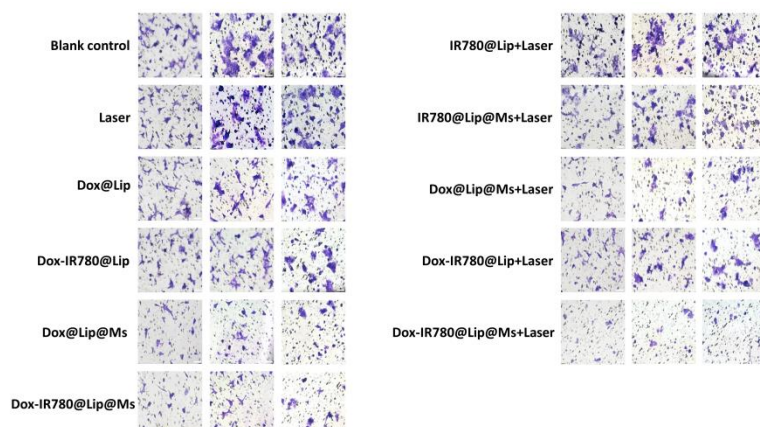

## Supplementary Figure Legend

**Supplementary Figure 8** The invasion ability of 4T1 cells treated with different materials with and without laser irradiation.

## 7. Supplementary Information 7 Fluorescence intensity of $^1\text{O}_2$

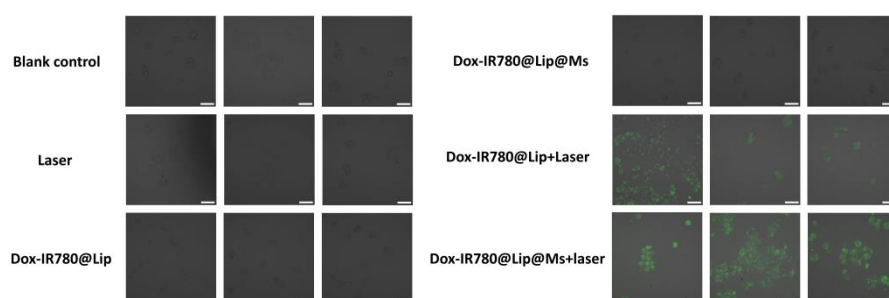

## Supplementary Figure Legend

**Supplementary Figure 9** Fluorescence intensity of  $^1\text{O}_2$  in 4T1 cells treated using different materials with and without laser irradiation.

## 8. Supplementary Information 8 Fluorescence of isolated organs and tumors

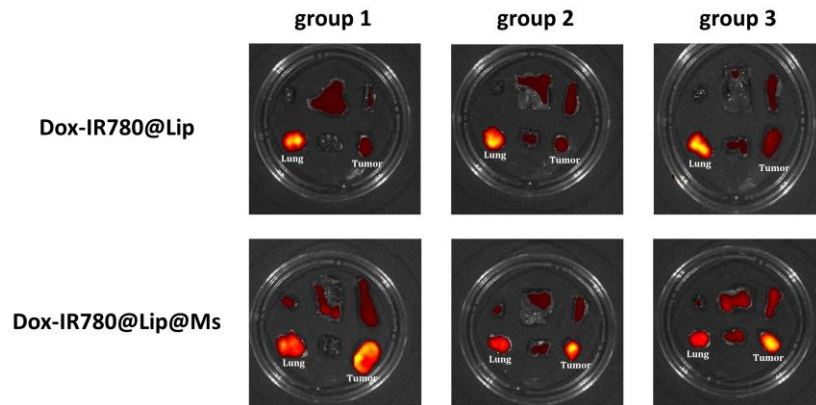

### Supplementary Figure Legend

**Supplementary Figure 10** Fluorescence of isolated organs and tumors administrated intravenously with Dox-IR780@Lip and Dox-IR780@Lip@Ms, respectively. The fluorescence signal of the tumors in the mice administered with Dox-IR780@Lip@Ms was significantly higher than that in the mice administered with Dox-IR780@Lip, and the fluorescence signal of the lungs in the mice administered with Dox-IR780@Lip was significantly higher than that in the mice administered with Dox-IR780@Lip@Ms (all  $P < 0.01$ ).

9. **Supplementary Information 9** Photos of murine tumors after different treatments

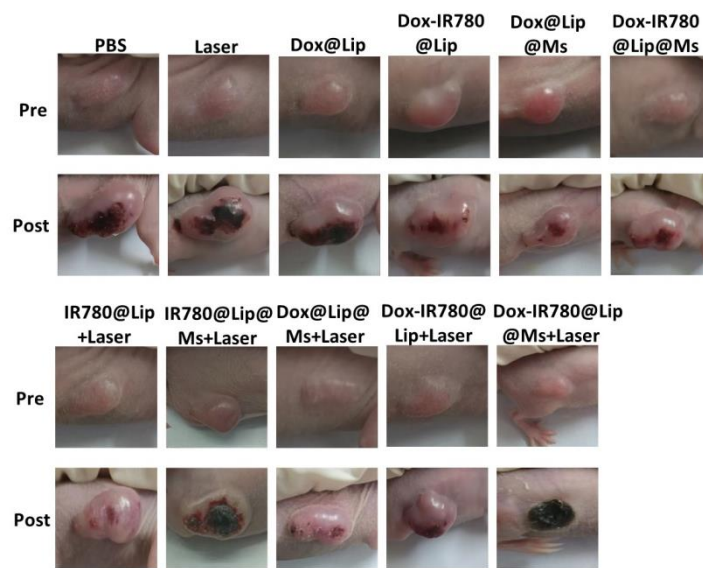

**Supplementary Figure Legend**

**Supplementary Figure 11** Photos of nude mice bearing xenograft tumors of breast cancer 4 T1 cells after different treatments, with and without laser irradiation.

## 10. Supplementary Information 10 Measurements of Tumor Volume

| Day 9         |                |                          | Day 11        |                |                          | Day 12        |                |                          |
|---------------|----------------|--------------------------|---------------|----------------|--------------------------|---------------|----------------|--------------------------|
| Long axis(mm) | Short axis(mm) | Volume(mm <sup>3</sup> ) | Long axis(mm) | Short axis(mm) | Volume(mm <sup>3</sup> ) | Long axis(mm) | Short axis(mm) | Volume(mm <sup>3</sup> ) |
| 15            | 11.8           | 1044.3                   | 17.9          | 12.4           | 1376.152                 | 18.4          | 13.6           | 1701.632                 |
| 15.5          | 12.9           | 1289.6775                | 15.9          | 13.5           | 1448.8875                | 16.2          | 13.5           | 1476.225                 |
| 16.5          | 10.9           | 980.1825                 | 16.9          | 11.6           | 1137.032                 | 17.4          | 11.9           | 1232.007                 |
| 16.4          | 11.2           | 1028.608                 | 17.2          | 12.1           | 1259.126                 | 17.9          | 12.8           | 1466.368                 |
| 17.9          | 10.9           | 1063.3495                | 18.8          | 11.8           | 1308.856                 | 19.1          | 12.3           | 1444.8195                |
| 16.7          | 10.9           | 992.0635                 | 17.9          | 11.7           | 1225.1655                | 18.3          | 12.1           | 1339.6515                |
| 15.7          | 10.6           | 882.026                  | 17.1          | 11.2           | 1072.512                 | 18.3          | 11.6           | 1231.224                 |
| 14.7          | 10.5           | 810.3375                 | 15.3          | 11.6           | 1029.384                 | 15.5          | 12             | 1116                     |
| 14.1          | 10.9           | 837.6105                 | 15.1          | 11             | 913.55                   | 15.1          | 11.1           | 930.2355                 |
| 16.7          | 10.5           | 920.5875                 | 17.9          | 11             | 1082.95                  | 17.9          | 11.6           | 1204.312                 |
| 16.4          | 9.9            | 803.682                  | 17            | 10.2           | 884.34                   | 17.4          | 10.6           | 977.532                  |
| 16.8          | 9.7            | 790.356                  | 16.8          | 10.4           | 908.544                  | 17            | 10.6           | 955.06                   |
| 14.3          | 9.5            | 645.2875                 | 15.1          | 9.7            | 710.3795                 | 16.1          | 10.1           | 821.1805                 |
| 13.7          | 8.5            | 494.9125                 | 13.2          | 8.5            | 476.85                   | 13.2          | 8.6            | 488.136                  |
| 15            | 8.2            | 504.3                    | 15.1          | 8.5            | 545.4875                 | 15.1          | 8.6            | 558.398                  |
| 14.8          | 9.3            | 640.026                  | 15            | 9.5            | 676.875                  | 15.5          | 10             | 775                      |
| 15.7          | 8.6            | 580.586                  | 16.2          | 9.3            | 700.569                  | 16.5          | 9.4            | 728.97                   |
| 16.6          | 8.3            | 571.787                  | 16.9          | 8.6            | 624.962                  | 16.9          | 8.7            | 639.5805                 |
| 14.6          | 8.6            | 539.908                  | 15.2          | 8.9            | 601.996                  | 15.6          | 9.1            | 645.918                  |
| 11.7          | 8.7            | 442.7865                 | 12.1          | 9.1            | 501.0005                 | 12            | 9.2            | 507.84                   |
| 12.1          | 9.8            | 581.042                  | 13.3          | 9.9            | 651.7665                 | 13.4          | 10.6           | 752.812                  |
| 15.5          | 9.7            | 729.1975                 | 16.4          | 10.2           | 853.128                  | 17            | 10.5           | 937.125                  |
| 14.1          | 9.6            | 649.728                  | 16.3          | 10.3           | 864.6335                 | 16.4          | 10.6           | 921.352                  |
| 14.6          | 9.3            | 631.377                  | 15.3          | 10.1           | 780.3765                 | 15.5          | 10.1           | 790.5775                 |
| 10.3          | 8              | 329.6                    | 9             | 6.9            | 214.245                  | 7             | 6.9            | 166.635                  |
| 10.6          | 8              | 339.2                    | 10.2          | 7.6            | 294.576                  | 9.4           | 7.6            | 271.472                  |
| 8.9           | 8.2            | 299.218                  | 8.8           | 7.8            | 267.696                  | 8.2           | 7.5            | 230.625                  |
